# Supplementary material for: Dual functionality of the amyloid protein TasA in Bacillus physiology and fitness on the phylloplane
Source: PubMed Central journal article supplement (PMC7171179; doi:10.1038/s41467-020-15758-z), 2020-04-20
Supplement: 41467_2020_15758_MOESM3_ESM.pdf [file 41467_2020_15758_MOESM3_ESM.pdf]

## Description of Additional Supplementary Files

### File name: Supplementary Data 1

**Description:** Differentially expressed genes in the  $\Delta$ *tasA* strain compared to the WT strain at 24 h. Genes with a Log2 FC value  $>1$  or  $<-1$  were considered as differentially expressed. Only genes that showed a combined p value  $<0.05$  were considered.

### File name: Supplementary Data 2

**Description:** Differentially expressed genes in the  $\Delta$ *tasA* strain compared to the WT strain at 48 h. Genes with a Log2 FC value  $>1$  or  $<-1$  were considered as differentially expressed. Only genes that showed a combined p value  $<0.05$  were considered.

### File name: Supplementary Data 3

**Description:** Differentially expressed genes in the  $\Delta$ *tasA* strain compared to the WT strain at 72 h. Genes with a Log2 FC value  $>1$  or  $<-1$  were considered as differentially expressed. Only genes that showed a combined p value  $<0.05$  were considered.
